# Supplementary material for: Relating Antimicrobial Resistance and Virulence in Surface-Water E. coli
Source: MDPI journal article supplement (doi:10.3390/microorganisms11112647), 2023-10-28
Supplement: s1 [file s1]

## SUPPLEMENTAL INFORMATION

**Title:** Relating Antimicrobial Resistance and Virulence in Surface Water *E. coli*

Authors: Connor D. LaMontagne, Elizabeth C. Christenson-Diver, Anna T. Rogers, Megan E. Jacob, Jill R. Stewart

2023

For publication in *Microorganisms*

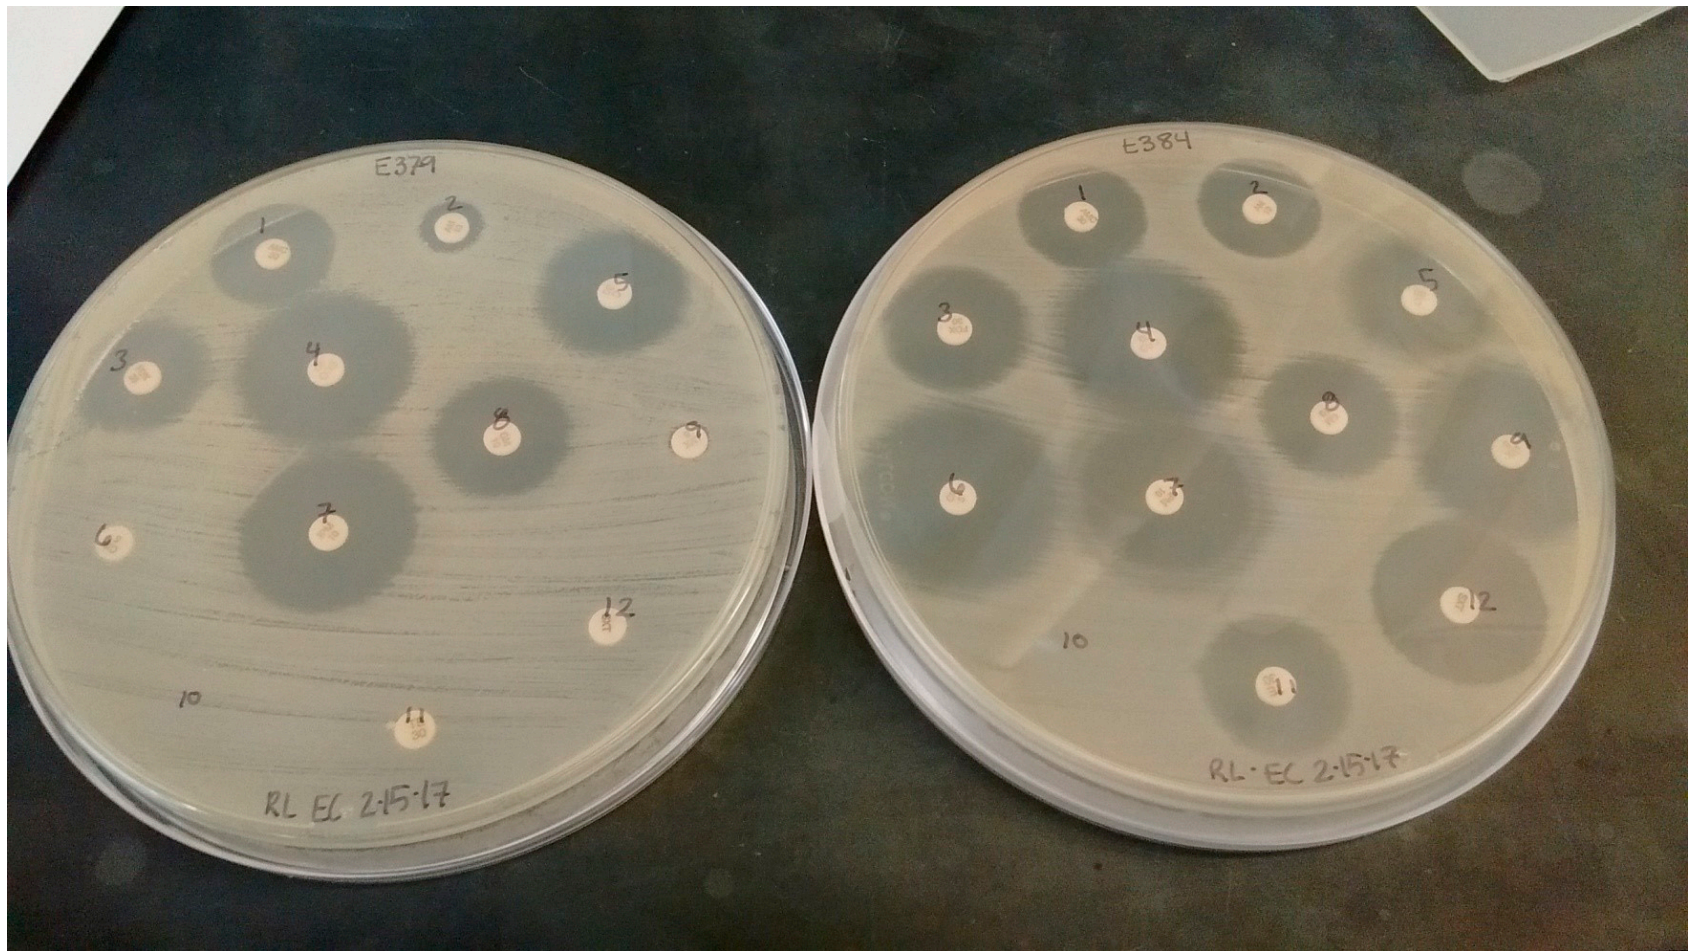

Figure S1. Examples of plates from our AMR testing via Kirby-Bauer disc diffusion. Resistance was assessed via the size of the clearing zone produced around each antibiotic disc, as determined by 2017 CLSI guidelines.

Table S1. Beta coefficients and 95% confidence intervals for regressions on the uncollapsed dataset. Models with the “at least 1 virulence” outcome do not include *fimH* here. Empty boxes indicate predictors without enough positive outcomes to model. Results from model group 1 are highlighted orange, model 2 yellow, model 3 blue, and model 4 grey. \*\* denotes  $p < 0.05$ .

|                                                 |                      | "At least 1 resistance"<br>(model 1 and model 3) |                            | "Individual resistances" (model 2 and model 4) |                        |                          |                 |          |                               |            |                           |                                |                                  |            |                            |
|-------------------------------------------------|----------------------|--------------------------------------------------|----------------------------|------------------------------------------------|------------------------|--------------------------|-----------------|----------|-------------------------------|------------|---------------------------|--------------------------------|----------------------------------|------------|----------------------------|
|                                                 |                      | At least 1 resistance                            | CHO presence               | Amoxicillin-clavulanate                        | Ampicillin             | Cefoxitin or Ceftriaxone | Chloramphenicol | Imipenem | Ciprofloxacin or Levofloxacin | Gentamicin | Tetracycline              | Sulfamethoxazole -Trimethoprim | Extended-Spectrum Beta Lactamase | Multi-drug | CHO presence               |
| "At least 1 virulence"<br>(model 1 and model 2) | At least 1 virulence | -0.39<br>(-0.99, 0.19)                           | -0.39<br>(-1.05, 0.29)     | 0.15<br>(-2.89, 2.27)                          | -0.36<br>(-1.53, 0.63) | -                        | -               | -        | -                             | -          | -0.40<br>(-1.04, 0.20)    | 1.44<br>(-0.30, 3.12)          | -                                | -          | -0.42<br>(-1.09, 0.26)     |
| "Individual virulences" (model 3 and model 4)   | bfp                  | -                                                | -                          | -                                              | -                      | -                        | -               | -        | -                             | -          | -                         | -                              | -                                | -          | -                          |
|                                                 | fimH                 | -0.57<br>(-1.78, 0.52)                           | -0.46<br>(-2.35, 0.89)     | -1.20<br>(-3.48, 1.92)                         | -0.51<br>(-1.88, 1.21) | -                        | -               | -        | -                             | -          | 0.24<br>(-0.87, 1.41)     | -                              | -                                | -          | -0.53<br>(-2.42, 0.82)     |
|                                                 | cnf-1                | -0.58<br>(-2.17, 0.79)                           | -1.00<br>(-2.37, 0.43)     | -                                              | -                      | -                        | -               | -        | -                             | -          | -0.39<br>(-1.98, 0.98)    | -                              | -                                | -          | -1.03<br>(-2.41, 0.40)     |
|                                                 | STa                  | -1.90**<br>(-3.78, -0.55)                        | 1.52<br>(-0.15, 4.44)      | -                                              | -                      | -                        | -               | -        | -                             | -          | -1.68**<br>(-3.57, -0.33) | -                              | -                                | -          | 1.46<br>(-0.20, 4.38)      |
|                                                 | EAST-1               | -0.23<br>(-0.97, 0.50)                           | -0.84**<br>(-1.60, -0.057) | -                                              | -0.77<br>(-2.63, 0.51) | -                        | -               | -        | -                             | -          | -0.10<br>(-0.86, 0.63)    | -                              | -                                | -          | -0.81**<br>(-1.58, -0.027) |
|                                                 | eae                  | -                                                | -0.98<br>(-4.23, 2.26)     | -                                              | -                      | -                        | -               | -        | -                             | -          | -                         | -                              | -                                | -          | -1.27<br>(-4.51, 1.96)     |
|                                                 | hlyA                 | -                                                | -                          | 2.05 (-1.30, 5.10)                             | 2.12 (-0.88, 5.38)     | -                        | -               | -        | -                             | -          | 0.35 (-2.21, 3.51)        | -                              | -                                | -          | -                          |

**Table S2. Test for multicollinearity among predictor variables via Pearson's  $r$ .  $r > 0.5$  (highlighted yellow) represents a moderate correlation and  $r > 0.8$  (highlighted red) represents a severe correlation. No substantial correlations were found between relevant predictors.**

|                               | CHO Upstream | At Least 1 Resistance | Amoxicillin-clavulanate | Ampicillin | Cefoxitin or Ceftriaxone | Chloramphenicol | Imipenem | Ciprofloxacin or Levofloxacin | Gentamicin | Tetracycline | Sulfamethoxazole-Trimethoprim | ESBL | Multi-drug |
|-------------------------------|--------------|-----------------------|-------------------------|------------|--------------------------|-----------------|----------|-------------------------------|------------|--------------|-------------------------------|------|------------|
| CHO Upstream                  | 1            | 0.08                  | -0.01                   | 0.08       | 0.04                     | 0.09            | NA       | 0.06                          | NA         | 0.07         | 0.09                          | 0.1  | 0.11       |
| At Least 1 Resistance         | 0.08         | 1                     | 0.15                    | 0.38       | 0.2                      | 0.17            | NA       | 0.11                          | NA         | 0.89         | 0.17                          | 0.28 | 0.3        |
| Amoxicillin-clavulanate       | -0.01        | 0.15                  | 1                       | 0.29       | 0.75                     | -0.03           | NA       | -0.02                         | NA         | 0.02         | -0.03                         | 0.54 | 0.52       |
| Ampicillin                    | 0.08         | 0.38                  | 0.29                    | 1          | 0.45                     | 0.35            | NA       | 0.28                          | NA         | 0.11         | 0.25                          | 0.68 | 0.65       |
| Cefoxitin or Ceftriaxone      | 0.04         | 0.2                   | 0.75                    | 0.45       | 1                        | -0.04           | NA       | -0.02                         | NA         | 0.05         | -0.04                         | 0.72 | 0.69       |
| Chloramphenicol               | 0.09         | 0.17                  | -0.03                   | 0.35       | -0.04                    | 1               | NA       | 0.3                           | NA         | 0.19         | 0.59                          | 0.47 | 0.58       |
| Imipenem                      | NA           | NA                    | NA                      | NA         | NA                       | NA              | 1        | NA                            | NA         | NA           | NA                            | NA   | NA         |
| Ciprofloxacin or Levofloxacin | 0.06         | 0.11                  | -0.02                   | 0.28       | -0.02                    | 0.3             | NA       | 1                             | NA         | 0.12         | 0.3                           | 0.38 | 0.36       |
| Gentamicin                    | NA           | NA                    | NA                      | NA         | NA                       | NA              | NA       | NA                            | 1          | NA           | NA                            | NA   | NA         |
| Tetracycline                  | 0.07         | 0.89                  | 0.02                    | 0.11       | 0.05                     | 0.19            | NA       | 0.12                          | NA         | 1            | 0.19                          | 0.19 | 0.2        |
| Sulfamethoxazole-Trimethoprim | 0.09         | 0.17                  | -0.03                   | 0.25       | -0.04                    | 0.59            | NA       | 0.3                           | NA         | 0.19         | 1                             | 0.34 | 0.46       |
| ESBL                          | 0.1          | 0.28                  | 0.54                    | 0.68       | 0.72                     | 0.47            | NA       | 0.38                          | NA         | 0.19         | 0.34                          | 1    | 0.96       |
| Multi-drug                    | 0.11         | 0.3                   | 0.52                    | 0.65       | 0.69                     | 0.58            | NA       | 0.36                          | NA         | 0.2          | 0.46                          | 0.96 | 1          |

**Table S3. Key assigning numbers to each group of models. Models with the “at least 1 virulence” outcome do not include *fimH* here.**

| Model Group | Outcome Variable     | Predictor Variables (after removing variables exhibiting separation) |
|-------------|----------------------|----------------------------------------------------------------------|
| 1           | At least 1 virulence | Any resistance, CHO presence                                         |
| 2           | At least 1 virulence | Ampicillin, amoxicillin-clavulanate, tetracycline, CHO presence      |
| 3           | <i>bfp</i>           | (No usable variable)                                                 |
|             | <i>fimH</i>          | Any resistance, CHO presence                                         |
|             | <i>cnf-1</i>         | Any resistance, CHO presence                                         |
|             | STa                  | Any resistance, CHO presence                                         |
|             | EAST-1               | Any resistance, CHO presence                                         |
|             | <i>eae</i>           | CHO presence                                                         |
|             | <i>hlyA</i>          | (No usable variable)                                                 |
| 4           | <i>bfp</i>           | (No usable variable)                                                 |
|             | <i>fimH</i>          | Ampicillin, amoxicillin-clavulanate, tetracycline, CHO presence      |
|             | <i>cnf-1</i>         | Tetracycline, CHO presence                                           |
|             | STa                  | Tetracycline, CHO presence                                           |
|             | EAST-1               | Ampicillin, tetracycline, CHO presence                               |
|             | <i>eae</i>           | CHO presence                                                         |
|             | <i>hlyA</i>          | Ampicillin, tetracycline                                             |

Table S4. Beta coefficients and 95% confidence intervals for regressions on the collapsed dataset. Models with the “at least 1 virulence” outcome do not include *fimH* here. Empty boxes indicate predictors without enough positive outcomes to model. Results from model group 1 are highlighted orange, model 2 yellow, model 3 blue, and model 4 grey. \*\* denotes  $p < 0.05$

|                                                          |                            | "At least 1 resistance"<br>(model 1 and model 3) |                        | "Individual resistances" (model 2 and model 4) |                           |                             |                 |          |                                  |            |                                |                                    |                                         |            |                           |
|----------------------------------------------------------|----------------------------|--------------------------------------------------|------------------------|------------------------------------------------|---------------------------|-----------------------------|-----------------|----------|----------------------------------|------------|--------------------------------|------------------------------------|-----------------------------------------|------------|---------------------------|
|                                                          |                            | At least 1<br>resistance                         | CHO presence           | Amoxicillin-<br>clavulanate                    | Ampicillin                | Cefoxitin or<br>Ceftriaxone | Chloramphenicol | Imipenem | Ciprofloxacin or<br>Levofloxacin | Gentamicin | Tetracycline                   | Sulfamethoxazole<br>- Trimethoprim | Extended-<br>Spectrum Beta<br>Lactamase | Multi-drug | CHO presence              |
| "At least 1<br>virulence"<br>(model 1<br>and<br>model 2) | At least<br>1<br>virulence | -0.82**<br>(-1.56, -0.12)                        | 0.059<br>(-0.74, 0.92) | 0.27<br>(-2.83, 2.58)                          | -0.36<br>(-1.72,<br>0.76) | -                           | -               | -        | -                                | -          | -0.77**<br>(-1.53,<br>-0.047)  | -                                  | -                                       | -          | 0.061<br>(-0.74,<br>0.92) |
| "Individual virulences" (model 3 and model 4)            | bfp                        | -                                                | -                      | -                                              | -                         | -                           | -               | -        | -                                | -          | -                              | -                                  | -                                       | -          | -                         |
|                                                          | fimH                       | -0.33<br>(-1.59, 0.84)                           | -0.39<br>(-2.29, 1.00) | -1.54<br>(-4.09, 1.64)                         | -0.10<br>(-1.69,<br>2.07) | -                           | -               | -        | -                                | -          | 0.54<br>(-0.67,<br>1.92)       | -                                  | -                                       | -          | -0.46<br>(-2.36,<br>0.93) |
|                                                          | cnf-1                      | -0.48<br>(-2.09, 0.96)                           | -0.69<br>(-2.15, 0.93) | -                                              | -                         | -                           | -               | -        | -                                | -          | -0.24<br>(-1.85,<br>1.20)      | -                                  | -                                       | -          | -0.71<br>(-2.17,<br>0.90) |
|                                                          | STa                        | -1.66**<br>(-3.57, -0.26)                        | 1.30<br>(-0.41, 4.23)  | -                                              | -                         | -                           | -               | -        | -                                | -          | -1.40**<br>(-3.31,<br>-0.0096) | -                                  | -                                       | -          | 1.26<br>(-0.45,<br>4.19)  |
|                                                          | EAST-1                     | -0.77<br>(-1.73, 0.10)                           | -0.31<br>(-1.25, 0.71) | -                                              | -0.38<br>(-2.27,<br>0.97) | -                           | -               | -        | -                                | -          | -0.71<br>(-1.71,<br>0.19)      | -                                  | -                                       | -          | -0.30<br>(-1.24,<br>0.72) |
|                                                          | eae                        | -                                                | -1.22<br>(-4.47, 2.01) | -                                              | -                         | -                           | -               | -        | -                                | -          | -                              | -                                  | -                                       | -          | -1.22<br>(-4.47,<br>2.01) |
|                                                          | hlyA                       | -                                                | -                      | -                                              | 1.97<br>(-1.30,<br>5.26)  | -                           | -               | -        | -                                | -          | -0.025<br>(-3.31,<br>3.25)     | -                                  | -                                       | -          | -                         |

Table S5. Beta coefficients and 95% confidence intervals for regressions on the collapsed dataset that used “at least 1 virulence” as the outcome, now including *fimH*.

|                                                          |                            | "At least 1 resistance"<br>(model 1) |                        | "Individual resistances" (model 2) |                           |                             |                 |          |                                  |            |                          |                                   |                                         |                            |
|----------------------------------------------------------|----------------------------|--------------------------------------|------------------------|------------------------------------|---------------------------|-----------------------------|-----------------|----------|----------------------------------|------------|--------------------------|-----------------------------------|-----------------------------------------|----------------------------|
|                                                          |                            | At least 1<br>resistance             | CHO presence           | Amoxicillin-<br>clavulanate        | Ampicillin                | Cefoxitin or<br>Ceftriaxone | Chloramphenicol | Imipenem | Ciprofloxacin or<br>Levofloxacin | Gentamicin | Tetracycline             | Sulfamethoxazole<br>-Trimethoprim | Extended-<br>Spectrum Beta<br>Lactamase | Multi-drug<br>CHO presence |
| "At least 1<br>virulence"<br>(model 1<br>and<br>model 2) | At least<br>1<br>virulence | -0.54<br>(-1.92, 0.70)               | -1.10<br>(-4.02, 0.61) | -1.63<br>(-4.21, 1.57)             | -0.16<br>(-1.77,<br>2.03) | -                           | -               | -        | -                                | -          | 0.42<br>(-0.85,<br>1.82) | -                                 | -                                       | -1.18<br>(-4.11,<br>0.53)  |
